# The Effects of a Brief, Water-Based Exercise Intervention on Cognitive Function in Older Adults

Andrew Fedor\*, Sarah Garcia, John Gunstad

*Department of Psychology, Kent State University, Kent, OH, USA*

\*Corresponding author at: Department of Psychology, Kent State University, Kent OH 44242, USA.

Tel.: +1-330-221-8672; fax: +1-330-672-3786

*E-mail address:* afedor1@kent.edu.

Accepted 7 January 2015

## Abstract

Physical inactivity is a modifiable risk factor for accelerated cognitive decline in older adults. Water-based exercise provides the same physiological benefits as land-based exercise with reduced risk of acute injury. The current study evaluated the effects of a brief, water-based exercise intervention on cognitive functioning and cardiovascular fitness in a group of community dwelling older adults. The exercise group ( $n = 27$ ,  $M_{age} = 63.26 \pm 7.64$ , 78% female) attended one moderate intensity water aerobics class per day for six consecutive days whereas the control group ( $n = 33$ ,  $M_{age} = 65.67 \pm 6.69$ , 75% female) continued their typical routine. Neuropsychological and cardiovascular fitness tests were given the week before and the week after the intervention to both groups. The exercise group demonstrated significant improvements in cardiovascular fitness, as well as executive function, attention, and memory over controls. This suggests a brief exercise program can provide benefits for older adults.

*Keywords:* Older adults; Mild cognitive impairment; Exercise; Executive function

## Introduction

By 2030, the number of adults over the age of 65 is expected to grow to 72 million, or roughly one in five Americans (Federal Interagency Forum on Aging-Related Statistics, 2012; National Center for Health Statistics, 2011). Older adults are at elevated risk for adverse neurocognitive outcomes including structural (Galluzzi, Beltramello, Filippi, & Frisoni, 2008; Raz & Rodrigue, 2006; Tisserand & Jolles, 2003) and functional (Hedden & Gabrieli, 2004; Park & Reuter-Lorenz, 2009) brain changes. These negative outcomes can range in severity from age-associated cognitive decline to dementia (Park, O'Connell, & Thomson, 2003).

A growing number of protective (i.e., education, Mediterranean diet) and risk factors (i.e., cardiovascular disease, type 2 diabetes, and obesity) for age-related cognitive decline have been identified (Biessels, ter Braak, Erkelens, & Hijman, 2001; Feart, Samieri, Alles, & Barberger-Gateau, 2013; Meng & D'Arcy, 2012; Nilsson & Nilsson, 2009; Okonkwo et al., 2010; Xingwang et al., 2013). Recent work raises the possibility that improved physical activity and exercise may ultimately reduce risk for adverse neurocognitive outcomes. Exercise is most commonly associated with improvements in multiple cognitive domains including global cognition, attention, executive functioning, and memory (Angevaren, Aufdemkampe, Verhaar, Aleman, & Vanhees, 2008; Colcombe & Kramer, 2003; Kara, Pinar, Ugur, & Oguz, 2005; Langlois et al., 2012). Older adults who are in the highest quartile of energy expenditure had a significantly lower risk of developing dementia than those in the lowest quartile (Podewils et al., 2005). Randomized control trials also suggest exercise is beneficial for those with Alzheimer's disease (Denkinger, Nikolaus, Denkinger, & Lukas, 2012; Erickson et al., 2011; Hamer & Chida, 2009; Rolland, van Kan, & Vellas, 2010; Yaguez, Shaw, Morris, & Matthews, 2011). Lower risk of developing vascular dementia (Aarsland, Sardahaec, Anderssen, & Ballard, 2010; Abbott et al., 2004; Minami et al., 1995; Podewils et al., 2005; Ravaglia et al., 2008; Verghese et al., 2003) and increased hippocampal volume (Colcombe et al., 2006) have also been demonstrated following regular exercise in this population.

Exercise interventions with older adults exhibit considerable variability in terms of length (Roma et al., 2013), exercise methodology (DiPietro, Dziura, Yeckel, & Neuffer, 2006; Forte et al., 2013; Macaluso et al., 2003), and intensity (Fukimoto et al., 2010; Malin et al., 2012; Roma et al., 2013; Yokokawa, Hongo, Urayama, Nisimura, & Kai, 2008). Despite difficulties in comparing across studies, research appears to suggest higher intensity and longer interventions produce more favorable results (DiPietro, Dziura, Yeckel, & Neuffer, 2006; Malin et al., 2012). Fortunately, a recent line of research suggests individuals do not need to engage in prolonged exercise interventions to receive benefits. Older adults with type 2 diabetes who engaged in an exercise intervention for just 7 days showed improved glycemic control (Kirwan, Solomon, Wojta, Staten, & Holloszy, 2009; Mikus, Oberlin, Libla, Boyle, & Thyfault, 2012), and insulin functioning (Kelly et al., 2012; Solomon et al., 2009), illustrating the potential benefits of short-term exercise regimens.

Despite benefits found from increased exercise, older adults identify numerous obstacles to exercise participation including time constraints, lack of motivation/determination, lack of familiarity with recreation facilities, fear of falling, poor physical health, osteoarthritis, and lack of knowledge about recommended type and intensity of activity (Costello, Kafchinski, Vrazel, & Sullivan, 2011; Irvine, Gelatt, Seeley, Macfarlane, & Gau, 2013; Lees, Clark, Nigg, & Newman, 2005; Matthews et al., 2010; Schutzer & Graves, 2004; Wang, Belza, Thompson, Whitney, & Bennett, 2007; Wilcox et al., 2009). One alternative approach is the use of water-based (rather than land-based) exercise programs as it places less stress on an individual's joints, as well as reduces the risk of falling (Hale, Waters, & Herbison, 2012). Water-based exercise has also been shown to increase levels of cardiovascular fitness in older adults (Bocalini, Serra, Murad, & Levy, 2008; Bocalini, Serra, Rica, & dos Santos, 2010; Campbell, D'Acquisto, D'Acquisto, & Cline, 2003; Wang et al., 2007) and by participating in water exercise, older adults are better able to meet guidelines for recommended levels of physical activity (Bocalini et al., 2008; Campbell, D'Acquisto, D'Acquisto, & Cline, 2003; Nikolai, Novotny, Bohnen, Schleis, & Dalleck, 2009).

The current study sought to examine the effects of a brief water-based exercise intervention on cardiovascular fitness and cognitive functioning in a group of healthy, community-dwelling older adults. Specifically, we hypothesized that the exercise intervention would lead to increased cardiovascular fitness and improved cognitive functioning.

## Methods

### Participants

A sample of 69 older adults was recruited for the study from local community recreation and wellness centers. Eligibility included older adults between the ages of 50 and 80 and native English speakers. Exclusion criteria included a lifetime history of any of the following conditions: neurological disorders (e.g., stroke, epilepsy), sleep apnea, severe mental illness (e.g., bipolar disorder, schizophrenia), brain injury with resulting loss of consciousness >5 min, unexplained recurrent chest pain, abnormal heart rhythm, narrowing of aortic valve, blood clot in the lungs, inflammation of the heart, ruptured blood vessel, acute infections, or impaired heart valve functioning.

The exercise group was composed of 33 participants, was 78.8% female, had an average age of 63.52 ( $\pm 7.33$ ), had 14.30 ( $\pm 2.49$ ) years of education, with an average BMI of 30.12 ( $\pm 6.1$ ), which is classified as Obese. The control group was composed of 36 participants, was 72.2% female, had an average age of 65.78 ( $\pm 7.33$ ), had 15.94 ( $\pm 2.91$ ) years of education, with an average BMI of 25.81 ( $\pm 5.50$ ), which is classified as overweight.

### Measures

**Neuropsychological test battery.** Participants completed a brief battery of neuropsychological measures to assess function across multiple cognitive domains.

**The Montreal cognitive assessment (MOCA; Nasreddine et al., 2005).** This test is a brief measure of global cognitive functioning at baseline. For the current study, the total score on the MOCA was used as a screening measure to ensure intact cognitive functioning at baseline.

**Adaptive rate continuous performance test (ARCPT; Cohen, 1993).** The ARCPT is a computerized measure of vigilance and sustained attention. This task requires participants to respond when a specific combination of letters appears on the screen. Indices measuring accuracy (task sensitivity), reaction time (final ISI), and vigilance (vigilance decrement) were used.

**Trail making test A and B (Reitan, 1958).** The trail making test A (TMT-A) asks participants to connect a series of 25 numbered dots in ascending order as quickly as they can (e.g., 1-2-3, etc.). Trail making test B (TMT-B) adds a set-shifting component to Trail making test A and requires participants to alternate between numbers and letters in ascending order (e.g., 1-A-2-B, etc.). Time to completion was used for both TMT-A and TMT-B.

*Frontal assessment battery* (FAB; Dubois, Slachevsky, Litvan, & Pillon, 2000). This test employs several short tasks to provide a broad measure of executive function. More specifically, participants are asked to identify similarities among two words (e.g., table, chair), name as many words as they can that start with a target letter (e.g., words that begin with 'S'), complete frontal-motor hand movements, and tap patterns with their dominant hand. The total score on the FAB was used.

*Stroop test* (Golden, 1978). This test measures selective attention and mental flexibility. Participants are asked to first read columns of words spelling out colors (word subtest), then asked to identify the color a series of Xs is printed in different colors (color subtest), and finally to indicate the color of the ink a word (which spells out a color) is printed in, regardless of the verbal content (color-word subtest). An interference score (predicted color word vs. actual color word) was used.

*Hopkins verbal learning test revised* (HVLTR; Brandt, 1991). This test asks participants to learn and remember a list of 12 words. Approximately 20 min after the three learning trials, participants are administered a delayed recall, and a recognition trial. An alternate version of the HVLTR was administered during follow-up testing to minimize potential practice effects. Total number of words learned, and number of words recalled after a delay were used.

*Rey–Osterrieth complex figure test* (Osterrieth, 1944; Rey, 1941). This test asks participants to copy a complex geometric figure. Immediately after completion of this learning trial participants are asked to draw as much of the figure from memory (immediate recall). Following a delay, participants are again asked to draw the figure from memory (delayed recall). The Taylor complex figure was administered as an alternate form to eliminate potential practice effects. The total scores from the immediate and delayed recall trials were used in analyses.

*Cardiovascular fitness.* In order to assess cardiovascular fitness, each participant completed the 2 minute step test (2MST; Rikli & Jones, 1999). During this test, participants are asked to march in place for 2 min raising the knee to a predetermined height. The required height for the knee raise was measured to be the midpoint between the individual's hip and knee. The number of times the right knee is raised to the required height was used. The 2MST has been demonstrated to be a feasible and accurate option for assessing cardiovascular fitness in older adults (Garcia et al., 2011; Rikli & Jones, 2002).

*Self-reported physical activity.* Participants were also asked about self-reported levels of physical activity through the rapid assessment of physical activity (RAPA; Topolski et al., 2006). This is a 9-item questionnaire designed to assess level of physical activity in older adults. Total score, ranging from 0 to 10 was used, with higher scores indicating greater levels of physical activity. The RAPA has a positive predictive power of 0.77 and a negative predictive power of 0.75 when compared with other measures of physical activity (Topolski et al., 2006).

*Exercise intervention.* The exercise intervention consisted of participants attending one moderate intensity water aerobics class per day for six consecutive days. This intensity was chosen as research has demonstrated higher levels of intensity to be effective in producing changes in physical functioning (DiPietro, Dziura, Yeckel, & Neuffer, 2006; Malin et al., 2012). Water aerobics classes were conducted by certified trainers and monitored by lifeguards certified in first aid.

A subset (42%) of those in the exercise group were randomly selected to wear heart rate monitors (Polar FT1; Polar Electro Inc., Lake Success, NY, USA) to ensure that they were reaching the desired 60%–70% of their maximum heart rate indicating moderate-to-high-intensity activity level (Malin et al., 2012). Participants were able to achieve a moderate level of exercise intensity, as evidenced by an average of 66% of their maximum heart rate during those sessions. The average maximum heart rate achieved was 113 ( $\pm 21.60$ ). The intervention appeared to be well tolerated by participants as they reported attending an average of 5.85 ( $\pm 0.36$ ) exercise classes during the week.

## Procedures

All procedures were approved by the Kent State University Institutional Review Board and all participants provided written informed consent prior to study enrollment. At the baseline session, participants in the exercise group completed self-report questionnaires, the neuropsychological test battery, and the 2MST. Individuals were then instructed to participate in one water aerobics class per day for six consecutive days. Water aerobics were designated as moderate-to-high intensity, and designed as to allow participants to safely reach 60%–70% maximum heart rate. Following the intervention, participants completed follow-up testing which included the neuropsychological test battery and the 2MST. Baseline and follow-up testing sessions were conducted ~2 weeks apart.

Participants in the control group completed the same self-report questionnaires, neuropsychological test battery, and the 2MST as the exercise group. However, these participants were instructed to continue their typical daily routine until follow-up testing. Similarly, baseline and follow-up testing sessions were conducted ~2 weeks apart.

## Data Analysis

A series of analyses examined differences between participants in the exercise and control groups. First, *t* tests were conducted to examine differences between the two groups at baseline. Results of these analyses were used as subsequent covariates. Repeated measures analysis of covariance (ANCOVA) was used to examine differences between the exercise and control group on cardiovascular fitness from baseline to post-testing. This procedure was repeated for examination of cognitive functioning from baseline to post-testing.

## Data Screening

In order to facilitate interpretation of data, all raw cognitive test scores were converted into *T*-scores (a distribution with a mean of 50 and a standard deviation of 10) using normative data based on age, and when possible, gender and education. Composite scores were created for the domains of attention (ARCPT-accuracy, ARCPT-reaction time, ARCPT-vigilance, and TMT-A) executive functioning (TMT-B, FAB, and stroop interference) and memory (HVLt-learning, HVLt-delayed recall, CFT-immediate recall, CFT-delayed recall) by using the mean of the *T*-scores for the selected indices within each domain. In keeping with convention of many clinical settings, impairment in domains for the current study was defined as *T*-score < 35 (i.e., <1.5 deviations below the mean) (Alosco et al., 2012).

Outliers and subsequent violations of univariate normality were identified through histograms and examination of *z*-scores for cognitive domains and physical fitness. Any *z*-score that was  $\pm 3$  *SD* from the mean was considered to be an outlier. Analyses of baseline data revealed one case with a *z*-score >3 on the 2MST (raw score = 200), thus this case was removed from further analyses. No violations of normality or outliers were present in the domains of attention, executive function, or memory.

## Results

### Participant Screening

Participants were screened for clinical levels of cognitive impairment using their baseline MOCA score. Consistent with established cutoffs, any participant with a baseline MOCA score <23 was removed from analyses (Luis, Keegan, & Mullan, 2009; Tsai et al., 2012). Analyses identified eight cases that met criteria for removal. These cases were removed from primary analyses in an effort to detect improvements in functioning in a cognitive healthy older adult population. Participants excluded from analyses had a significantly lower estimated intelligence than those retained ( $t(67) = -2.74, p \leq .01$ ), but no other demographic differences emerged.

### Baseline Comparisons of Exercise and Control Groups

The final sample consisted of 60 older adults: 27 in the exercise group and 33 in the control group. No between group differences emerged in terms of age ( $t(58) = -1.28, p = .21$ ), gender ( $\chi^2 = 0.03, p = .85$ ), education ( $t(58) = -1.95, p = .06$ ), or estimated intelligence ( $t(58) = -0.86, p = .40$ ). The groups differed in self-reported baseline physical activity ( $t(58) = -3.11, p = .003$ ) with the control group reporting more activity on the RAPA. The groups were also significantly different in terms of the 2MST ( $t(58) = -2.22, p = .03$ ) with the control group demonstrating higher step count (see Table 1).

**Table 1.** Demographic characteristics of exercise and control groups

|                                         | Exercise group ( <i>N</i> = 27) Mean ( <i>SD</i> ) | Control group ( <i>N</i> = 33) Mean ( <i>SD</i> ) | Statistic ( <i>t</i> or $\chi^2$ ) | <i>p</i> -Value |
|-----------------------------------------|----------------------------------------------------|---------------------------------------------------|------------------------------------|-----------------|
| Age                                     | 63.26 (7.64)                                       | 65.67 (6.96)                                      | -1.28                              | .20             |
| Gender (M/F)                            | 6/21                                               | 8/25                                              | 0.03                               | .85             |
| Years of education                      | 14.63 (2.39)                                       | 16.00 (2.94)                                      | -1.95                              | .06             |
| Estimated intelligence (standard score) | 9.78 (3.61)                                        | 10.52 (3.05)                                      | -0.86                              | .40             |
| <b>Self-RAPA</b>                        | <b>7.44 (1.81)</b>                                 | <b>8.70 (1.31)</b>                                | <b>-3.11</b>                       | <b>&lt;.01</b>  |
| <b>Fitness (2MST)</b>                   | <b>94.74 (30.15)</b>                               | <b>110.24 (24.05)</b>                             | <b>-2.22</b>                       | <b>.03</b>      |

Note: Bold indicates significant difference.

### Short-term Exercise Results in Improved Cardiovascular Fitness

In order to examine possible changes in cardiovascular fitness (2MST) from baseline to post-testing, a repeated measures ANCOVA was conducted in both the exercise and control groups adjusting for baseline levels of the RAPA. Overall, a significant group by fitness interaction was observed ( $F(1, 57) = 7.97, p = .007$ ). Analyses revealed the exercise group improved from baseline to post-testing on the 2MST ( $F(1, 26) = 6.22, p = .019, d = 0.39$ ), exhibiting a 12.3% increase in cardiovascular fitness. Interestingly, the control group demonstrated a decrease in performance on the 2MST ( $F(1, 32) = 4.07, p = .05, d = 0.35$ ) (see Table 2).

### Short-Term Exercise Results in Improved Cognitive Functioning

To investigate possible changes in cognitive functioning composite scores from baseline to post-testing, a series of repeated measures ANCOVA were conducted in both the exercise and control groups adjusting for baseline RAPA and 2MST. When examining changes on executive functioning, a significant interaction was observed between executive function and group ( $F(1, 53) = 10.64, p = .002$ ). The exercise group demonstrated an increase from baseline to post-testing ( $F(1, 24) = 58.46, p < .001, d = 0.92$ ). Conversely, the control group did not change from baseline to post-testing ( $F(1, 31) = 1.63, p = 0.21, d = 0.11$ ).

Similar to executive function, the exercise group demonstrated an increase from baseline to post-testing on the attention composite score ( $F(1, 24) = 12.82, p = .002, d = 0.53$ ). The control group did not change ( $F(1, 32) = 2.65, p = .11, d = 0.25$ ) and no interaction was observed ( $F(1, 54) = 0.36, p = .55$ ).

The exercise group demonstrated a significant increase in performance on the memory composite score from baseline to follow-up testing ( $F(1, 24) = 9.27, p = .005, d = 0.41$ ) and a significant interaction was observed ( $F(1, 54) = 4.34, p = .04$ ). The control group did not change from baseline to follow-up testing ( $F(1, 31) = 0.01, p = .92, d = 0.01$ ) (see Table 2).

To further characterize the amount of change in the exercise group, a change score was calculated for each of the cognitive measures. The exercise group demonstrated a significant overall average increase in performance ( $t(1, 58) = 3.63, p = .001$ ). Regarding change in each cognitive domain, the exercise group demonstrated significant change in the domains of executive functioning ( $t(1, 58) = 3.77, p \leq .001$ ) and memory ( $t(1, 57) = 2.26, p \leq .05$ ). No such change was observed for attention ( $t(1, 57) = 1.18, p = .24$ ).

## Discussion

The results of the current study show that a short exercise program provides numerous benefits for an older adult population. Building from previous literature, it was hypothesized that 1 week of water aerobics would lead to improvements in cardiovascular fitness and cognitive functioning. Consistent with these expectations, the exercise intervention produced significant increases in both cardiovascular fitness and cognitive functioning across multiple domains. Several aspects of the study warrant further discussion.

The current study found that 1 week of water aerobics produced a significant increase in cardiovascular fitness. Few studies have examined the effects of water aerobics on cardiovascular fitness (Meredith-Jones, Waters, Legge, & Jones, 2011), though most suggest equivalent or even greater benefits relative to land-based interventions. When placed in water, the body is subjected to forces (i.e., hydrostatic pressure) which are not found during land-based exercise (Meredith-Jones et al., 2011). During water immersion, the lower body is subject to increased pressure, causing blood to be diverted to the thoracic area placing the heart under an increased workload (Chu, Rhodes, Taunton, & Martin, 2002). Additionally, the pressure of the water inhibits

**Table 2.** Comparison of performance on fitness testing, and cognitive functioning composites from pre- to post-intervention between groups

|                              | Exercise group                   |                                   | F-value      | Sig             | Control group                    |                                   | F-value | Sig |
|------------------------------|----------------------------------|-----------------------------------|--------------|-----------------|----------------------------------|-----------------------------------|---------|-----|
|                              | Pre-testing mean<br>T-score (SD) | Post-testing mean<br>T-score (SD) |              |                 | Pre-testing mean<br>T-score (SD) | Post-testing mean<br>T-score (SD) |         |     |
| Fitness (2MST) (raw score)   | <b>94.74 (30.15)</b>             | <b>106.37 (29.04)</b>             | <b>6.22</b>  | <b>.01</b>      | 110.24 (24.05)                   | 102.24 (20.57)                    | 4.07    | .05 |
| Executive function composite | <b>45.00 (7.01)</b>              | <b>50.91 (5.66)</b>               | <b>58.46</b> | <b>&lt;.001</b> | 48.46 (6.01)                     | 49.15 (6.11)                      | 1.63    | .21 |
| Attention composite          | <b>52.44 (7.21)</b>              | <b>56.36 (7.33)</b>               | <b>12.83</b> | <b>&lt;.01</b>  | 56.68 (8.62)                     | 58.65 (6.76)                      | 2.65    | .11 |
| Memory composite             | <b>43.24 (9.53)</b>              | <b>46.98 (8.48)</b>               | <b>9.27</b>  | <b>&lt;.01</b>  | 47.74 (8.66)                     | 47.86 (5.69)                      | 0.01    | .92 |

Note: Bold indicates significant difference.



the body's ability to fully expand the lungs during an inhalation, increasing the workload of the lungs by as much as 60% (Agostoni, Gurtner, Torri, & Rahn, 1966). These physiological changes effectively challenge the cardiovascular system during water-based exercise and may help account for the rapid improvement in fitness found in the current study. Future studies are needed to confirm these effects and further clarify the possible advantages of water-based exercise in older adult populations.

One interesting and unexpected finding was the control group decreasing in cardiovascular fitness at the follow-up time point. While the exact explanation for this remains unclear several possibilities exist. Participants in the control group were aware of their group membership and may have modified behavior similar to the Hawthorne effect. Additionally, participants may have put forth reduced effort during the follow-up testing session due to misconceptions about their role within the study. As this finding was unexpected and future research is needed to elucidate other possible explanations.

Consistent with expectations, the current study also found 1 week of water aerobics produced significant increases in executive function, attention, and memory performance. The cognitive benefits of land-based exercise for older adults are well established and can improve executive function, attention, and memory (Angevaeren et al., 2008; Colcombe & Kramer, 2003; Kara, Pinar, Ugur, & Oguz, 2005; Langlois et al., 2012). Fewer studies have examined the potential benefits of water aerobics on cognitive functioning (Cancela Carral & Ayan Perez, 2007; Hawkins, Kramer, & Capaldi, 1992; Munguia-Izquierdo & Legaz-Arrese, 2007). However, the exercise program may have differentially affected participants depending on their level of baseline cognitive impairment. For example, prior research indicates those with cognitive impairment at baseline show different levels of improvement following an exercise intervention (Tanne et al., 2005).

Improvement in physiological indices known to influence cognitive functioning may also be contributing to the current results. For example, 15.2% of those in the exercise group reported a diagnosis of T2DM and such persons are at risk for cognitive impairments (Tiehuis et al., 2010; Yeung, Fischer, & Dixon, 2009). Prior research has suggested those with T2DM can achieve better control of blood glucose levels following 7 days of high-intensity exercise (i.e., 70% of maximum heart rate) (Kirwan et al., 2009). Thus, gains in blood glucose control in the exercise group may be implicated in the observed improvement in cognitive functioning. The current findings not only support brief exercise interventions as a method for improving cognition, but suggest that water aerobics is a safe and effective alternative to land-based exercise regimens.

Several limitations of the current study require further discussion. A primary limitation is the lack of randomization to study condition as participants selected to be in either the exercise or control group. This is important as past work has identified poor health as a reason older adults chose not to join an exercise program (Biedenweg et al., 2014). Future studies utilizing random assignment of participants are needed to resolve any possible confounds due to selection bias. Another limitation is found in the modest sample size of the current study, as excluding of participants for impaired cognition at baseline resulted in a smaller than expected sample available for analysis, ultimately limiting statistical power. By using a lower than recommended cut-off score on the MOCA (i.e., 23 vs. 26), the possibility exists that some participants may have been in the early stages of a degenerative condition, even if they did not currently meet criteria for these disorders. It is possible this methodological approach may have influenced study findings. Finally, this preliminary study collected relatively little information about possible mechanisms for improved cognitive function after a brief exercise intervention and future studies are needed to clarify possible metabolic, cardiorespiratory, and neural changes that underlie these benefits.

Despite these limitations, the current results of the study may have meaningful implications for future work. Past research (Middleton et al., 2011) suggests older adults need to engage in long-term physical activity and exercise to prevent cognitive decline. However, the current results suggest the same improvements in cognitive function can be achieved in a shorter duration when performed at a higher intensity level. The short duration is essential, given the many barriers which prevent older adults from regular exercise (Mcphate, Simek, & Haines, 2013). Another important feature of the current study is the use of water-based exercise over traditional land-based exercise. Moving exercise into the water eliminates many concerns related to falling and lower extremity arthritis (Lees et al., 2005; Wang et al., 2007).

In summary, the current study shows that older adults exhibit improved cardiovascular fitness and cognitive function after a brief, water-based exercise program. While future research is needed to confirm these effects, the current study raises the possibility that even brief exercise interventions can provide meaningful benefits in a high-risk population.

## Funding

This work was supported by the Kent State University Graduate Student Senate, and the Kent State University Applied Psychology Center.

## Conflict of Interest

None declared.

## References

- Aarsland, D., Sardaheae, F. S., Anderssen, S., & Ballard, C. (2010). Is physical activity a potential preventative factor for vascular dementia. A systematic review. *Aging and Mental Health*, *14*, 38–395.
- Abbott, R. D., White, L. R., Ross, G. W., Masaki, K. H., Curb, J. D., & Petrovich, H. (2004). Walking and dementia in physically capable elderly men. *Journal of the American Medical Association*, *292*, 1447–1453.
- Agostoni, E. G., Gurtner, G., Torri, G., & Rahn, H. (1966). Respiratory mechanics during submersion and negative-pressure breathing. *Journal of Applied Physiology*, *21*, 251–258.
- Alosco, M. L., Spitznagel, M. B., Raz, N., Cohen, R., Sweet, L. H., Colbert, L. H., et al. (2012). Obesity interacts with cerebral hypoperfusion to exacerbate cognitive impairment in older adults with heart failure. *Cerebrovascular Diseases Extra*, *2*, 88–98.
- Angevaren, M., Aufdemkampe, G., Verhaar, H. J. J., Aleman, A., & Vanhees, L. (2008). Physical activity and enhanced fitness to improve cognitive function in older people without known cognitive impairment. *Cochrane Database of Systematic Reviews*, *2*, CD005381.
- Biedenweg, K., Meischke, H., Bohl, A., Hammerback, K., Williams, B., Poe, P., et al. (2014). Understanding older adults motivators and barriers to participating in organized supporting exercise behaviors. *Journal of Primary Prevention*, *35*, 1–11.
- Biessels, G. J., ter Braak, E. W. M. T., Erkelens, D. W., & Hijman, R. (2001). Cognitive function in patients with type 2 diabetes mellitus. *Neuroscience Research Communications*, *28*, 11–22.
- Brandt, J. (1991). The Hopkins verbal learning test: Development of a new memory test with six equivalent forms. *Clinical Neuropsychologist*, *5*, 125–142.
- Bocalini, D. S., Serra, A. J., Murad, N., & Levy, R. F. (2008). Water versus land-based exercise effects on physical fitness in older women. *Geriatrics & Gerontology International*, *8*, 265–271.
- Bocalini, D. S., Serra, A. J., Rica, R. L., & dos Santos, L. (2010). Repercussions of training and detraining by water-based exercise on functional fitness and quality of life: A short-term follow-up in healthy older women. *Clinics*, *65*, 1305–1309.
- Campbell, J. A., D'Acquisto, L. J., D'Acquisto, D. M., & Cline, M. G. (2003). Metabolic and cardiovascular response to shallow water exercise in young and older women. *Medicine and Science in Exercise and Sports*, *35*, 675–681.
- Cancela Carral, J. M., & Ayan Perez, C. (2007). Effects of high-intensity combined training on women over 65. *Gerontology*, *53*, 340–346.
- Chu, K. S., Rhodes, E. C., Taunton, J. E., & Martin, A. D. (2002). Maximal physiological responses to deep-water and treadmill running in young and older women. *Journal of Aging and Physical Activity*, *10*, 306–313.
- Cohen, R. (1993). *The neuropsychology of attention*. Springer: New York.
- Colcombe, S. J., Erickson, K. I., Scalf, P. E., Kim, J. S., Prakash, R., McAuley, E., et al. (2006). Aerobic exercise training increases brain volume in aging humans. *Journal of Gerontology: Medical Sciences*, *11*, 1166–1170.
- Colcombe, S. J., & Kramer, A. F. (2003). Fitness effects on the cognitive function of older adults: A meta-analytic study. *Psychological Science*, *14*, 125–130.
- Costello, E., Kafchinski, M., Vrazel, J., & Sullivan, P. (2011). Motivators, barriers, and beliefs regarding physical activity in an older adult population. *Journal of Geriatric Physical Therapy*, *34*, 138–147.
- Denkinger, M. D., Nikolaus, T., Denkinger, C., & Lukas, A. (2012). Physical activity for the prevention of cognitive decline. *Zeitschrift für Gerontologie und Geriatrie*, *45*, 11–16.
- DiPietro, L., Dziura, J., Yeckel, C. W., & Neuffer, D. (2006). Exercise and improved insulin sensitivity in older women: Evidence of enduring benefits of higher intensity training. *Journal of Applied Physiology*, *100*, 142–149.
- Dubois, B., Slachevsky, A., Litvan, I., & Pillon, B. (2000). The FAB: A frontal assessment battery at bedside. *Neurology*, *55*, 1621–1626.
- Erickson, K. I., Voss, M. W., Prakash, R. S., Basak, C., Szabo, A., Chaddock, L., et al. (2011). Exercise training increases size of hippocampus and improves memory. *Proceedings of the National Academy of Sciences of the United States of America*, *108*, 3017–3022.
- Federal Interagency Forum on Aging-Related Statistics. (2012). *Older Americans 2012: key indicators of well being*. From [http://www.agingstats.gov/agingstatsdotnet/Main\\_Site/Data/2012\\_Documents/Docs/EntireChartbook.pdf](http://www.agingstats.gov/agingstatsdotnet/Main_Site/Data/2012_Documents/Docs/EntireChartbook.pdf) (Accessed on 27 November 2012).
- Feat, C., Samieri, C., Alles, B., & Bargerger-Gateau, P. (2013). Potential benefits of adherence to the Mediterranean diet on cognitive health. *The Proceedings of the Nutrition Society*, *72*, 140–152.
- Forte, R., Boreham, C. A. G., Leite, C. J., De Vito, G., Brennan, L., Gibney, E. R., et al. (2013). Enhancing cognitive functioning in the elderly: Multicomponent vs. resistance training. *Clinical Interventions in Aging*, *8*, 19–27.
- Fukimoto, N., Prasad, A., Hasting, J. L., Arbab-Zadeh, A., Bhella, P. S., Shibata, S., et al. (2010). Cardiovascular effects of 1 year of progressive and vigorous exercise training in previous sedentary individuals older than 65 years of age. *Circulation*, *2*, 1797–1805.
- Galluzzi, S., Beltramello, A., Filippi, M., & Frisoni, G. B. (2008). Aging. *Neurological Science*, *29*, S296–S300.
- Garcia, S., Spitznagel, M. B., Cohen, R., Raz, N., Sweet, L., Colbert, L., et al. (2011). Depression is associated with cognitive dysfunction in older adults with heart failure. *Cardiovascular Psychiatry and Neurology*, *2011*, Article ID 368324, 6 pp.
- Golden, J. C. (1978). *Stroop color and word test*. Chicago: Stoelting.
- Hale, L. A., Waters, D., & Herbison, P. (2012). A randomized controlled trial to investigate the effects of water-based exercise to improve falls risk and physical function in older adults with lower extremity osteoarthritis. *Archives of Physical Medicine and Rehabilitation*, *93*, 27–34.
- Hamer, M., & Chida, Y. (2009). Physical activity and risk of neurodegenerative disease: A systematic review of prospective evidence. *Psychological Medicine*, *39*, 3–11.
- Hawkins, H. L., Kramer, A. F., & Capaldi, D. (1992). Aging, exercise, and attention. *Psychology and Aging*, *7*, 643–653.
- Hedden, T., & Gabrieli, J. D. E. (2004). Insights into the aging mind: A view from cognitive neuroscience. *Nature Reviews: Neuroscience*, *5*, 87–97.
- Irvine, A. B., Gelatt, V. A., Seeley, J. R., Macfarlane, P., & Gau, J. M. (2013). Web-based intervention to promote physical activity by sedentary older adults: Randomized controlled trial. *Journal of Medical Internet Research*, *15*, e19.
- Kara, B., Pinar, L., Ugur, F., & Oguz, M. (2005). Correlations between aerobic capacity, pulmonary and cognitive functioning in older women. *International Journal of Sports Medicine*, *26*, 220–224.
- Kelly, K. R., Blaszcak, A., Haus, J. B., Patrick-Melin, A., Fealy, C. E., Solomon, T. P. J., et al. (2012). A 7-d exercise program increases high-molecular weight adiponectin in obese adults. *Medicine and Science in Exercise and Sports*, *44*, 69–74.

- Kirwan, J. P., Solomon, T. P. J., Wojta, D. M., Staten, M. A., & Holloszy, J. O. (2009). Effects of 7 days of exercise training on insulin sensitivity and responsiveness in type 2 diabetes. *American Journal of Physiology: Endocrinology and Metabolism*, *297*, E151–E156.
- Langlois, F., Vu, T. T. M., Chasse, K., Dupuis, G., Kergoat, M. J., & Bherer, L. (2012). Benefits of physical exercise training on cognition and quality of life in frail older adults. *Journals of Gerontology, Series B: Psychological Sciences and Social Sciences*, *68*, 400–404.
- Lees, F. D., Clark, P. G., Nigg, C. R., & Newman, P. (2005). Barriers to exercise behavior among older adults: A focus group study. *Journal of Aging and Physical Activity*, *13*, 23–33.
- Luis, C. A., Keegan, A. P., & Mullan, M. (2009). Cross validation of the Montreal Cognitive Assessment in community dwelling older adults residing in the Southeastern US. *International Journal of Geriatric Psychiatry*, *24*, 197–201.
- Macaluso, A., Young, A., Gibb, K. S., Rowe, D. A., & De Vito, G. (2003). Cycling as a novel approach to resistance training increases muscle strength, power, and selected functional ability in healthy older women. *Journal of Applied Physiology*, *95*, 2544–2553.
- Malin, S. K., Neimi, N., Solomon, T. P. J., Haus, J. M., Kelly, K. R., Filion, J., et al. (2012). Exercise training with weight loss and either a high or low glycemic diet reduces metabolic syndrome severity in older adults. *Annals of Nutrition and Metabolism*, *61*, 135–141.
- Mathews, A. E., Laditka, S. B., Laditka, J. N., Wilcox, S., Corwin, S. J., Liu, R., et al. (2010). Older adults perceived physical activity enablers and barriers: A multicultural perspective. *Journal of Aging and Physical Activity*, *18*, 119–140.
- Mcphate, L., Simek, E. M., & Haines, T. P. (2013). Program related factors are associated with adherence to group exercise interventions for the prevention of falls: A systematic review. *Journal of Physiotherapy*, *59*, 81–92.
- Meng, X., & D'Arcy, C. (2012). Education and dementia in the context of the cognitive reserve hypothesis: A systematic review with meta-analyses and quantitative analyses. *Plos One*, *7*, e38268.
- Meredith-Jones, K., Waters, D., Legge, M., & Jones, L. (2011). Upright water-based exercise to improve cardiovascular and metabolic health: A qualitative review. *Complementary Therapies in Medicine*, *19*, 93–103.
- Middleton, L. E., Manini, T. M., Simonsick, E. M., Harris, T. B., Barnes, D. E., Tylavsky, F., et al. (2011). Activity energy expenditure and incident cognitive impairment in older adults. *Archives of Internal Medicine*, *171*, 1251–1257.
- Mikus, C. R., Oberlin, D. J., Libla, J., Boyle, L. J., & Thyfault, J. P. (2012). Glycaemic control is improved by 7 days of aerobic exercise training in patients with type 2 diabetes. *Diabetologia*, *55*, 1417–1423.
- Minami, Y., Tsuji, I., Fukao, A., Hisamichi, S., Asano, H., Sato, M., et al. (1995). Physical status and dementia risk: A three year prospective study in urban Japan. *International Journal of Social Psychiatry*, *41*, 47–54.
- Munguia-Izquierdo, D., & Legaz-Arrese, A. (2007). Exercise in warm water decreases pain and improves cognitive function in middle aged women with fibromyalgia. *Clinical and Experimental Rheumatology*, *25*, 823–830.
- Nasreddine, Z. S., Phillips, N. A., Bedirian, V., Charbonneau, S., Whitehead, V., Collin, I., et al. (2005). The Montreal Cognitive Assessment, MoCA: A brief screening tool for mild cognitive impairment. *Journal of the American Geriatric Society*, *53*, 695–699.
- National Center for Health Statistics. Health, United States. (2011). *With special features on socioeconomic status and health*. Hyattsville, MD. 2012. From <http://www.ncbi.nlm.nih.gov/books/NBK98752/pdf/TOC.pdf> (Accessed on 05 January 2014).
- Nikolai, A. L., Novotny, B. A., Bohnen, C. L., Schleis, K. M., & Dalleck, L. C. (2009). Cardiovascular and metabolic responses to water aerobics exercise in middle-aged and older adults. *Journal of Physical Activity and Health*, *6*, 333–338.
- Nilsson, L. G., & Nilsson, E. (2009). Overweight and cognition. *Scandinavian Journal of Psychology*, *50*, 660–667.
- Okonkwo, O. C., Cohen, R. A., Gunstad, J., Tremont, G., Alosco, M. L., & Poppas, A. (2010). Longitudinal trajectories of cognitive decline among older adults with cardiovascular disease. *Cerebrovascular Diseases*, *30*, 362–373.
- Osterrieth, P. A. (1944). Le test de copie d'une figure complexe. *Archives de Psychologie*, *30*, 206–356.
- Park, D. C., & Reuter-Lorenz, P. (2009). The adaptive brain: Aging and neurocognitive scaffolding. *Annual Review of Psychology*, *60*, 173–196.
- Park, H. L., O'Connell, J. E., & Thomson, R. G. (2003). A systematic review of cognitive decline in the general elderly population. *International Journal of Geriatric Psychiatry*, *18*, 1121–1134.
- Podewils, L. J., Guallar, E., Kuller, L. H., Fried, L. P., Lopez, O. L., Carlson, M., et al. (2005). Physical activity, APOE genotype, and dementia risk: Findings from the Cardiovascular Health Cognition Study. *American Journal of Epidemiology*, *161*, 639–651.
- Ravaglia, G., Forti, P., Lucicseare, A., Pisacane, N., Rietti, E., Bianchin, M., et al. (2008). Physical activity and dementia risk in the elderly: Findings from a prospective Italian study. *Neurology*, *70*, 1786–1794.
- Raz, N., & Rodrigue, K. M. (2006). Differential aging of the brain: Patterns, cognitive correlates and modifiers. *Neuroscience and Biobehavioral Reviews*, *30*, 730–748.
- Reitan, R. (1958). Validity of the trail making test as an indicator of organic brain damage. *Perceptual and Motor Skills*, *8*, 271–276.
- Rey, A. (1941). L'examen psychologie dan les cad d'encephalopathie traumatique (Les Problemes). *Archives de Psychologie*, *28*, 286–340.
- Rikli, R. E., & Jones, J. (1999). Development and validation of a functional fitness test for community-residing older adults. *Journal of Aging and Physical Activity*, *7*, 129–161.
- Rikli, R., & Jones, C. J. (2002). Measuring functional fitness of older adults. *International Journal on Active Aging*, *1*, 25–30.
- Rolland, Y., van Kan, G. A., & Vellas, B. (2010). Healthy brain aging: Role of exercise and physical activity. *Clinics in Geriatric Medicine*, *26*, 75–87.
- Roma, M. F. B., Busse, A. L., Betoni, R. A., de Melo, A. C., Kong, J., Santarem, M., et al. (2013). Effects of resistance training and aerobic exercise in elderly people concerning physical fitness and ability: A prospective clinical trial. *Einstein*, *11*, 152–157.
- Schutzer, K. A., & Graves, B. S. (2004). Barriers and motivations to exercise in older adults. *Preventative Medicine*, *39*, 1056–1061.
- Solomon, T. P. J., Haus, J. M., Kelly, K. R., Cook, M. D., Riccardi, M., Rocco, M., et al. (2009). Randomized trial on the effects of a 7-d low-glycemic diet and exercise intervention on insulin resistance in older obese humans. *American Journal of Clinical Nutrition*, *90*, 1222–1229.
- Tanne, D., Freimark, D., Poreh, A., Merzeliak, O., Bruck, B., Schwammenthal, Y., et al. (2005). Cognitive functions in severe congestive heart failure before and after and exercise program. *International Journal of Cardiology*, *103*, 145–149.
- Tiehuis, A., van der Meer, F., Mail, W., Pleizeir, M., Biessels, G. J., Kappelle, J., et al. (2010). MR spectroscopy of cerebral white matter in type 2 diabetes; no association with clinical variables and cognitive performance. *Neuroradiology*, *52*, 155–161.
- Tisserand, D. J., & Jolles, J. (2003). On the involvement of prefrontal networks in cognitive ageing. *Cortex*, *39*, 1107–1128.



- Topolski, T. D., LoGerfo, J., Patrick, D. L., Williams, B., Walwick, J., & Patrick, M. B. (2006). The rapid assessment of physical activity (RAPA) among older adults. *Preventing Chronic Disease, 3*, A118.
- Tsai, C. F., Lee, W. J., Wang, S. J., Shia, B. C., Nasreddine, Z., & Fuh, J. L. (2012). Psychometrics of the Montreal Cognitive Assessment (MoCA) and its subscales: Validation of the Taiwanese version of the MoCA and an item response theory analysis. *International Psychogeriatrics, 24*, 651–658.
- Verghese, J., Lipton, R., Katz, M. J., Hall, C. B., Derby, C. A., Kuslansky, G., et al. (2003). Leisure activities and the risk of dementia in the elderly. *The New England Journal of Medicine, 348*, 2508–2516.
- Wang, T., Belza, B., Thompson, F. E., Whitney, J. D., & Bennett, K. (2007). Effects of aquatic exercise on flexibility, strength, and aerobic fitness in adults with osteoarthritis of the hip or knee. *Journal of Advanced Nursing, 57*, 141–152.
- Wilcox, S., Sharkey, J. R., Mathews, A. E., Laditka, J. N., Laditka, S. B., Logsdon, R. G., et al. (2009). Perceptions and beliefs about the role of physical activity on brain health in older adults. *The Gerontologist, 49*, S61–S71.
- Xingwang, Y., Scott, T., Gao, X., Maras, J. E., Bakun, P. J., & Tucker, K. L. (2013). Mediterranean diet, healthy eating index 2005, and cognitive function in middle-aged and older Puerto Rican adults. *Journal of the Academy of Nutrition and Dietetics, 113*, 276–281.
- Yaguez, L., Shaw, K. N., Morris, R., & Matthews, D. (2011). The effects of cognitive functions of a movement-based intervention with Alzheimer's type dementia: A pilot study. *International Journal of Geriatric Psychiatry, 26*, 173–181.
- Yeung, S. E., Fischer, A. L., & Dixon, R. A. (2009). Exploring the effects of type 2 diabetes on cognitive function in older adults. *Neuropsychology, 23*, 1–9.
- Yokokawa, Y., Hongo, M., Urayama, H., Nisimura, T., & Kai, I. (2008). Effects of low-intensity resistance exercise with vascular occlusion on physical function in healthy older people. *Bioscience Trends, 2*, 117–123.
